# Supplementary material
Source: PubMed Central journal article supplement (PMC423271)

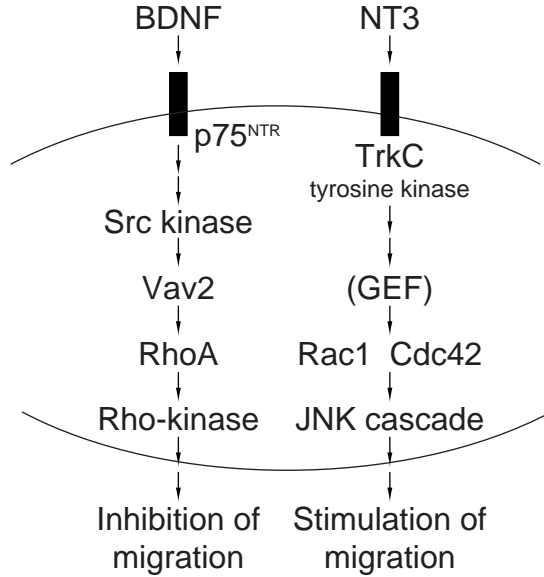

Supplement: pnas_101_23_8774__2.pdf [file pnas_101_23_8774__2.pdf]
